# Supplementary material
Source: publisher figshare collection journal article supplement (https://tandf.figshare.com/articles/dataset/_/4294553)
Supplement: Supplementary file 1 [file 1]

| Function                                         | Protein name                                             | Gene name | Uniprot Accession | Copy number per platelet (Burkhart et al. 2012) | Release (%) (activated ratio/resting ratio) (Wiiten et al 2013) | Releasate concentration (ng/ml) per platelet (Wijten et al 2013) | Concentration (ppm) (Wiiten et al 2013) | Fold change thrombin compared to collagen (Vélez et al. 2015) | Fold change collagen compared to thrombin (Vélez et al Sci Rep 2015) |
|--------------------------------------------------|----------------------------------------------------------|-----------|-------------------|-------------------------------------------------|-----------------------------------------------------------------|------------------------------------------------------------------|-----------------------------------------|---------------------------------------------------------------|----------------------------------------------------------------------|
| anoiaoenesis                                     |                                                          |           |                   |                                                 |                                                                 |                                                                  |                                         |                                                               |                                                                      |
| (anti-)angiogenesis (also immunomodulatory facto | Histidine-rich glycoprotein                              | HRG       | P04196            | 1,000                                           | 74.7                                                            | 14                                                               | 104                                     |                                                               |                                                                      |
| angiogenesis                                     | Angiopoietin-1                                           | ANGPT1    | Q15389            | 2,800                                           | 67.2                                                            | 9                                                                | 80                                      |                                                               |                                                                      |
| (pro-)angiogenesis (also cell growth)            | Vascular endothelial growth factor C                     | VEGFC     | P49767            | 1,100                                           | 82.4                                                            | 6                                                                | 61                                      |                                                               |                                                                      |
| angioenesis (also cell development)              | Platelet-derived growth factor subunit B                 | PDGFB     | P01127            | 3,000                                           | 59.6                                                            | 6                                                                | 110                                     |                                                               |                                                                      |
| angiogenesis                                     | Extracellular matrix protein 1                           | ECM1      | Q16610            | 2,600                                           | 86.1                                                            | 2                                                                | 20                                      |                                                               |                                                                      |
| cell adhesion                                    |                                                          |           |                   |                                                 |                                                                 |                                                                  |                                         |                                                               |                                                                      |
| cell adhesion (also (anti-)angiogenesis)         | Thrombospondin-1                                         | THBS1     | P07996            | 101,000                                         | 74.9                                                            | 2,261                                                            | 3,638                                   |                                                               | 2.0                                                                  |
| cell adhesion                                    | Fibrinogen gamma chain                                   | FGG       | P02679            | 74,100                                          | 33.0                                                            | 667                                                              | 5,607                                   |                                                               | 4.6; 4.3; 3.5; 3.7                                                   |
| cell adhesion                                    | Fibrinogen beta chain                                    | FGB       | P02675            | 88,900                                          | 33.1                                                            | 614                                                              | 5,431                                   |                                                               |                                                                      |
| cell adhesion                                    | Fibrinogen alpha chain                                   | FGA       | P02671            | 72,700                                          | 34.7                                                            | 356                                                              | 1,917                                   |                                                               |                                                                      |
| cell adhesion                                    | von Willebrand factor                                    | VWF       | P04275            | 11,100                                          | 27.5                                                            | 160                                                              | 450                                     |                                                               |                                                                      |
| cell adhesion                                    | Fibronectin                                              | FN1       | P02751            | 3,500                                           | 43.3                                                            | 81                                                               | 200                                     | 2.1                                                           |                                                                      |
| cell adhesion                                    | Vitronectin                                              | VTN       | P04004            | 3,200                                           | 49.1                                                            | 9                                                                | 111                                     |                                                               |                                                                      |
| cell adhesion                                    | Transforming growth factor-beta-induced protein ig-h3    | TGFB1     | Q15582            | 1,300                                           | 71.6                                                            | 7                                                                | 47                                      |                                                               |                                                                      |
| cell death                                       |                                                          |           |                   |                                                 |                                                                 |                                                                  |                                         |                                                               |                                                                      |
| cell death (apoptosis)                           | Serglycin                                                | SRGN      | P10124            | 22,700                                          | 88.3                                                            | 29                                                               | 452                                     |                                                               |                                                                      |
| cell arowth                                      |                                                          |           |                   |                                                 |                                                                 |                                                                  |                                         |                                                               |                                                                      |
| cell growth                                      | SPARC                                                    | SPARC     | P09486            | 19,200                                          | 82.6                                                            | 147                                                              | 1,034                                   |                                                               |                                                                      |
| chemotaxis                                       |                                                          |           |                   |                                                 |                                                                 |                                                                  |                                         |                                                               |                                                                      |
| chemotaxis                                       | Platelet basic protein                                   | PPBP      | P02775            | 479,000                                         | 86.8                                                            | 1,474                                                            | 14,395                                  |                                                               |                                                                      |
| chemotaxis/innate immunity                       | C-C motif chemokine 5                                    | RANTES (C | P13501            | 4,500                                           | 36.3                                                            | 8                                                                | 497                                     |                                                               |                                                                      |
| coaagation                                       |                                                          |           |                   |                                                 |                                                                 |                                                                  |                                         |                                                               |                                                                      |
| pro-coagulation                                  | Multimerin-1                                             | MMRN1     | Q13201            | 31,100                                          | 31.4                                                            | 229                                                              | 1,060                                   |                                                               | 4.3                                                                  |
| pro-coagulation                                  | Coagulation factor V                                     | F5        | P12259            | 8,300                                           | 36.3                                                            | 146                                                              | 392                                     | 10.9                                                          |                                                                      |
| pro-coagulation                                  | Kininogen-1                                              | KNG1      | P01042            | 2,000                                           | 71.6                                                            | 8                                                                | 54                                      |                                                               |                                                                      |
| pro-coagulation                                  | Coagulation factor XIII B chain                          | F13B      | P05160            | 1,200                                           | 77.8                                                            | 2                                                                | 14                                      |                                                               |                                                                      |
| anti-coagulation (also fibrinolysis)             | Vitamin K-dependent protein S                            | PROS1     | P07225            | 5,300                                           | 79.2                                                            | 47                                                               | 217                                     | 2.0                                                           |                                                                      |
| anti-coagulation                                 | Antithrombin-III                                         | SERPINC1  | P01008            | identified/not determined                       | 75.0                                                            | 10                                                               | 84                                      |                                                               |                                                                      |
| anti-coagulation                                 | Amyloid-like protein 2                                   | APLP2     | Q06481            | 2,000                                           | 77.2                                                            | 5                                                                | 29                                      |                                                               |                                                                      |
| fibrinolvsis                                     |                                                          |           |                   |                                                 |                                                                 |                                                                  |                                         |                                                               |                                                                      |
| (anti-)fibrinolysis                              | Plasminogen activator inhibitor 1                        | SERPINE1  | P05121            | 5,900                                           | 80.6                                                            | 57                                                               | 386                                     |                                                               |                                                                      |
| fibrinolysis                                     | Plasminogen                                              | PLG       | P00747            | 4,400                                           | 69.7                                                            | 19                                                               | 98                                      |                                                               |                                                                      |
| immunity                                         |                                                          |           |                   |                                                 |                                                                 |                                                                  |                                         |                                                               |                                                                      |
| innate immunity                                  | Platelet factor 4                                        | PF4       | P02776            | 355,000                                         | 80.9                                                            | 1,365                                                            | 17,576                                  |                                                               |                                                                      |
| innate immunity                                  | Ig gamma-1 chain C region                                | IGHG1     | P01857            | 4,100                                           | 81.7                                                            | 120                                                              | 854                                     |                                                               |                                                                      |
| wound healing, immune system                     | Latent-transformina growth factor beta-binding protein 1 | LTBP1     | Q14766            | 15,300                                          | 41.5                                                            | 160                                                              | 487                                     |                                                               |                                                                      |
| innate immunity                                  | Complement C3                                            | C3        | P01024            | 3,000                                           | 83.3                                                            | 80                                                               | 153                                     |                                                               |                                                                      |
| innate immunity                                  | Ig gamma-2 chain C region                                | IGHG2     | P01859            | 2,500                                           | 85.5                                                            | 73                                                               | 548                                     |                                                               |                                                                      |
| innate immunity                                  | Ig gamma-3 chain C region                                | IGHG3     | P01860            | 6,700                                           | 76.0                                                            | 69                                                               | 511                                     |                                                               |                                                                      |
| wound healing, immune system                     | Transforming growth factor beta-1                        | TGFB1     | P01137            | 10,600                                          | 40.6                                                            | 51                                                               | 628                                     |                                                               |                                                                      |
| innate immunity                                  | Ig kappa chain C region                                  | IGKC      | P01834            | 19,600                                          | 80.1                                                            | 45                                                               | 993                                     | 2.1                                                           |                                                                      |
| innate immunity                                  | Ig lambda-2 chain C regions                              | IGLC2     | P0CG05            | 21,400                                          | 84.3                                                            | 27                                                               | 628                                     | 2.1                                                           |                                                                      |
| innate immunity                                  | Complement factor H                                      | CFH       | P08603            | 2,300                                           | 80.1                                                            | 15                                                               | 51                                      |                                                               |                                                                      |
| innate immunity                                  | Ig alpha-1 chain C region                                | IGHA1     | P01876            | 1,400                                           | 63.7                                                            | 10                                                               | 127                                     |                                                               |                                                                      |
| innate immunity                                  | Complement C4-A                                          | C4A       | P0C0L4            | 1,200                                           | 78.6                                                            | 7                                                                | 20                                      |                                                               |                                                                      |
| adaptive immunity                                | Ig mu chain C region                                     | IGHM      | P01871            | 1,900                                           | 46.3                                                            | 2                                                                | 36                                      |                                                               |                                                                      |
| innate immunity                                  | Ig kappa chain V-I region CAR                            | KV104     | P01596            | 750                                             | 76.9                                                            | 2                                                                | 76                                      |                                                               |                                                                      |
| innate immunity                                  | Ig kappa chain V-III region NG9 (Fragment)               | KV303     | P01621            | not identified                                  | 80.9                                                            | 1                                                                | 33                                      |                                                               |                                                                      |
| protease and protease inhibitors                 |                                                          |           |                   |                                                 |                                                                 |                                                                  |                                         |                                                               |                                                                      |
| protease inhibitor                               | Alpha-1-antitrypsin                                      | SERPINA1  | P01009            | 5,800                                           | 73.3                                                            | 41                                                               | 311                                     |                                                               |                                                                      |
| protease inhibitor                               | Glia-derived nexin                                       | SERPINE2  | P07093            | 5,400                                           | 63.6                                                            | 18                                                               | 181                                     |                                                               |                                                                      |
| proease inhibitor                                | Metalloproteinase inhibitor 1                            | TIMP1     | P01033            | 5,800                                           | 81.9                                                            | 12                                                               | 184                                     | 2.4                                                           |                                                                      |
| proease inhibitor                                | Inter-alpha-trypsin inhibitor heavy chain H4             | ITI14     | Q14624            | 1,600                                           | 71.6                                                            | 7                                                                | 36                                      |                                                               |                                                                      |
| proease inhibitor                                | Metalloproteinase inhibitor 3                            | TIMP3     | P35625            | 4,000                                           | 63.2                                                            | 2                                                                | 59                                      |                                                               |                                                                      |
| protein binding                                  |                                                          |           |                   |                                                 |                                                                 |                                                                  |                                         |                                                               |                                                                      |
| protein binding/folding                          | Clusterin                                                | CLU       | P10909            | 8,700                                           | 36.2                                                            | 72                                                               | 807                                     | 3.6                                                           | 3.2; 4.2; 4.7                                                        |
| substrate transport                              |                                                          |           |                   |                                                 |                                                                 |                                                                  |                                         |                                                               |                                                                      |
| substrate transport/carrier                      | Serum albumin                                            | ALB       | P02768            | 52,600                                          | 83.7                                                            | 856                                                              | 2,485                                   | 3.2                                                           | 5.4; 11.5                                                            |
| substrate transport                              | Ceruloplasmin                                            | CP        | P00450            | 1,300                                           | 72.5                                                            | 2                                                                | 12                                      |                                                               |                                                                      |
| others                                           |                                                          |           |                   |                                                 |                                                                 |                                                                  |                                         |                                                               |                                                                      |
| protein interaction                              | Nidogen-1                                                | NID1      | P14543            | 7,000                                           | 62.9                                                            | 63                                                               | 205                                     |                                                               |                                                                      |
| unknown                                          | Amyloid beta A4 protein                                  | APP       | P05067            | 9,300                                           | 78.9                                                            | 43                                                               | 182                                     | 2.4                                                           |                                                                      |
| unknown                                          | Alpha-1B-glycoprotein                                    | A1BG      | P04217            | 2,100                                           | 87.3                                                            | 10                                                               | 75                                      |                                                               |                                                                      |
| collagenase                                      | Interstitial collagenase                                 | MMP1      | P03956            | not identified                                  | 88.9                                                            | 5                                                                | 43                                      |                                                               |                                                                      |
| (pro-)inflammatory                               | Dickkopf-related protein 1                               | DKK1      | O94907            | not identified                                  | 85.8                                                            | 1                                                                | 25                                      |                                                               |                                                                      |
| substrate binding                                | Selenoprotein P                                          | SEPP1     | P49908            | 1,100                                           | 72.8                                                            | 1                                                                | 12                                      |                                                               |                                                                      |
